# Supplementary material for: Non-enzymatic electrochemical glucose sensing by Cu2O octahedrons: elucidating the protein adsorption signature
Source: Royal Society of Chemistry journal article supplement (doi:10.1039/d0nj04431h), 2020-12-08
Supplement: d0nj04431h1.pdf [file d0nj04431h1.pdf]

## Supporting Information

### **Non-Enzymatic Electrochemical Glucose Sensing by Cu<sub>2</sub>O Octahedrons: Elucidating Protein Adsorption Signature**

Soumyadipta Rakshit,<sup>a</sup> Srabanti Ghosh,<sup>b</sup> Rimi Roy<sup>c</sup> and Subhash Chandra Bhattacharya<sup>a\*</sup>

<sup>a</sup> Department of Chemistry, Jadavpur University, Kolkata 700 032, India

<sup>b</sup> Department of Chemical, Biological and Macromolecular Sciences, S. N. Bose National Centre for Basic Sciences, Block JD, Sector III, Salt Lake, Kolkata 700 098, India.

<sup>c</sup> Department of Chemistry, Presidency University, Kolkata 700 073, India.

\*E-mail: [sbjuchem@yahoo.com](mailto:sbjuchem@yahoo.com); [scbhattacharyya@chemistry.jdvu.ac.in](mailto:scbhattacharyya@chemistry.jdvu.ac.in)

Tel: 033 2414 6223; Fax: (+) 91(033) 2414 6584

## Contents

|                  |                                                                                                                                                                                |      |
|------------------|--------------------------------------------------------------------------------------------------------------------------------------------------------------------------------|------|
| <b>Fig. S1</b>   | FESEM, TEM and HRTEM images of Cu <sub>2</sub> O microstructures along with schematic representation of growth mechanism.                                                      | S-2  |
| <b>Table ST1</b> | Comparative study between the fabricated non-enzymatic glucose sensor and other literature works with respect to their performances.                                           | S-3  |
| <b>Fig. S2</b>   | Amperometric response curve of the octahedron Cu <sub>2</sub> O modified electrode derived from Figure 4a presenting the response time for the successive addition of glucose. | S-4  |
| <b>Fig. S3</b>   | Change in the amperometric current response of Cu <sub>2</sub> O octahedron modified electrode towards successive addition of glucose.                                         | S-4  |
| <b>Fig. S4</b>   | The plot of peak current difference as a function of the concentration of glucose.                                                                                             | S-5  |
| <b>Fig. S5</b>   | Amperometric response of the Cu <sub>2</sub> O octahedron modified electrode in 0.1 M NaOH successive addition of human serum.                                                 | S-6  |
| <b>Fig. S6</b>   | Calibration Curve for different proteins in PBS buffer (pH~ 7.4) with experimentally determined data.                                                                          | S-7  |
| <b>Fig. S7</b>   | The CD spectral changes of proteins in the absence and presence of Cu <sub>2</sub> O octahedrons.                                                                              | S-8  |
| <b>Fig. S8</b>   | Dynamic Light Scattering (DLS) graphs of native proteins and unadsorbed proteins in the supernatant.                                                                           | S-9  |
| <b>Fig. S9</b>   | Dynamic Light Scattering graphs of Cu <sub>2</sub> O octahedrons in the presence of proteins.                                                                                  | S-9  |
| <b>Table ST2</b> | The estimated secondary structure content of proteins in the absence and presence of Cu <sub>2</sub> O octahedrons.                                                            | S-10 |
| <b>Fig. S10</b>  | FESEM images of Cu <sub>2</sub> O upon adsorption of different proteins.                                                                                                       | S-11 |

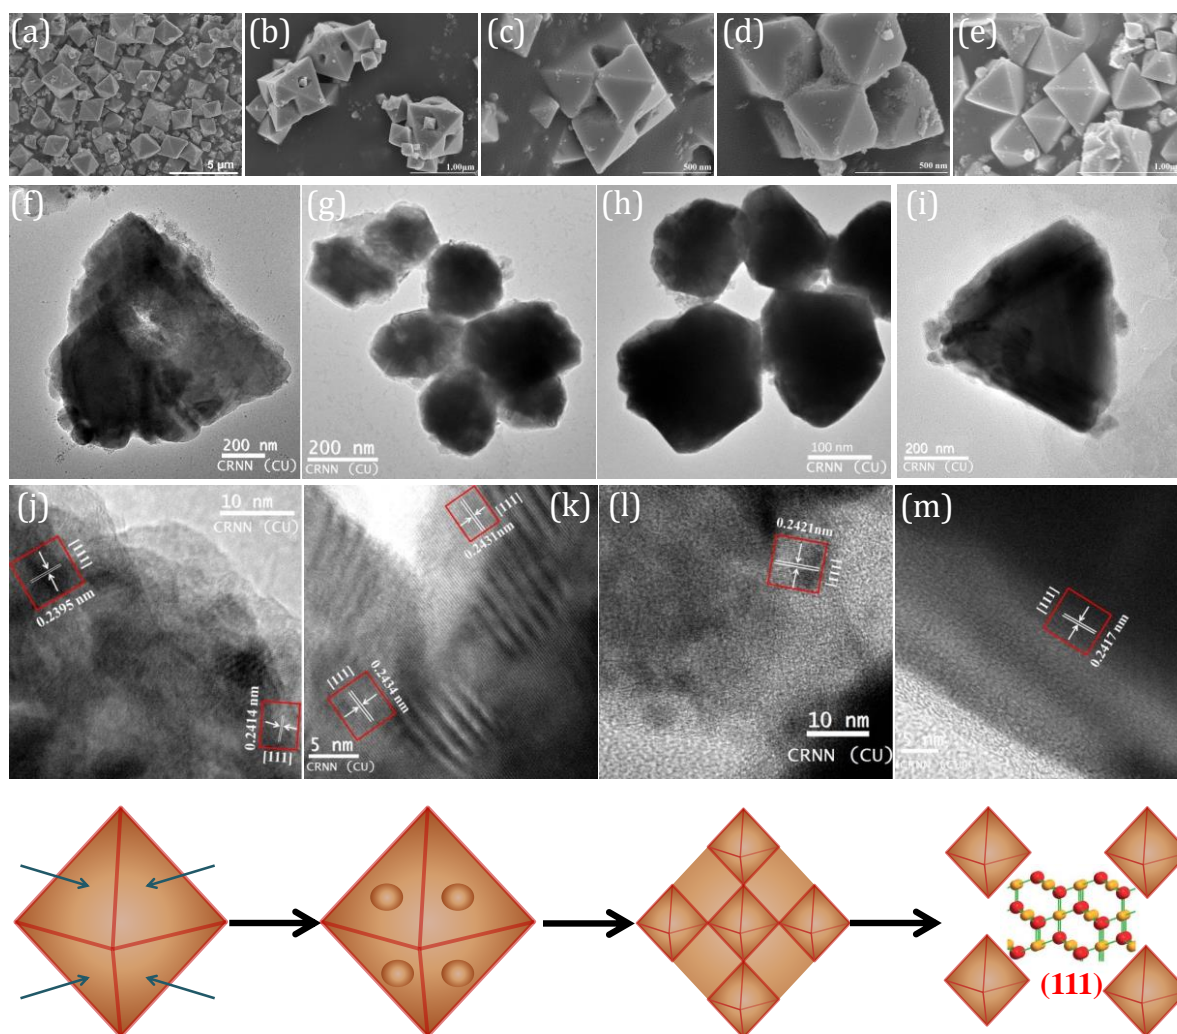

**Fig. S1.** (a), (b), (c), (d) and (e) are the FESEM images of Cu<sub>2</sub>O microstructures fabricated at reaction times 10, 15, 20, 25 and 30 min. (f), (g), (h) and (i) illustrate the TEM images of Cu<sub>2</sub>O octahedrons fabricated at reaction times 10, 15, 25 and 30 min. (j), (k), (l) and (m) represent corresponding HRTEM images. The lower panel displays a schematic representation of generation and growth mechanism of Cu<sub>2</sub>O octahedrons along with the side views of (111) surfaces (Orange and red spheres indicate Cu and O atoms, respectively).

**Table ST1.** Comparative study between the fabricated non-enzymatic glucose sensor and other literature works with respect to their performances.

| Type of electrode                                                        | Electrolyte | Response time (s) | Potential (V) | Sensitivity ( $\mu\text{A mM}^{-1} \text{cm}^{-2}$ ) | Linear range (mM) | LOD ( $\mu\text{M}$ ) | References       |
|--------------------------------------------------------------------------|-------------|-------------------|---------------|------------------------------------------------------|-------------------|-----------------------|------------------|
| Porous $\text{Cu}_2\text{O}$                                             | 0.1 M NaOH  | –                 | 0.60          | 10.95                                                | 0.002–0.35        | 1.3                   | 1                |
| Hierarchical $\text{Cu}_2\text{O}$                                       | 0.1 M NaOH  | –                 | 0.60          | 13.3                                                 | 0.05–1.1          | 47.2                  | 2                |
| Mesocrystalline $\text{Cu}_2\text{O}$ hollow nanocubes                   | 0.1 M NaOH  | –                 | 0.60          | 52.5                                                 | –                 | –                     | 3                |
| Helical $\text{TiO}_2$ nanotube arrays modified by $\text{Cu}_2\text{O}$ | 0.1 M NaOH  | 3                 | 0.65          | 14.56                                                | 3.0–9.0           | 62.0                  | 4                |
| $\text{Cu}_2\text{O}$ cubes/nafion                                       | 0.1 M NaOH  | <5                | 0.60          | 121.7                                                | –                 | 38.0                  | 5                |
| Cubic $\text{Cu}_2\text{O}$                                              | 0.1 M NaOH  | –                 | 0.60          | 22.669                                               | 0.1–2.5           | 12.8                  | 6                |
| $\text{Cu}_2\text{O}$ nanourchin with highly anisotropic nanoarms        | 0.1 M NaOH  | –                 | 0.60          | 1231.7                                               | 0.019–1.09        | 18.5                  | 7                |
| Cu/ $\text{Cu}_2\text{O}$ nanoclusters deposited carbon spheres          | 0.1 M NaOH  | –                 | 0.65          | 63.8                                                 | 0.01–0.69         | 5.0                   | 8                |
|                                                                          |             |                   |               | 22.6                                                 | 1.19–3.69         |                       |                  |
| Copper oxide microspheres                                                | 0.1 M NaOH  | <5                | 0.60          | 26.59                                                | 2.0–9.0           | 20.6                  | 9                |
| Spherical Cu/ $\text{CuO}/\text{SiO}_2$ nanostructures                   | 0.1 M NaOH  | 1                 | [-1 – +1]     | 8.0                                                  | 3.0–12.0          | 1450                  | 10               |
| $\text{Cu}_2\text{O}$ octahedrons                                        | 0.1 M NaOH  | 1.45              | 0.60          | 382.98                                               | 0.001–1.0         | 0.96                  | <b>This work</b> |
|                                                                          |             |                   |               | 55.59                                                | 1.0–5.0           |                       |                  |

#### References:

- (1) L. Zhang, Y. H. Ni and H. Li, *Microchim. Acta*, 2010, **171**, 103–108.
- (2) S. Li, Y. J. Zheng, G. W. W. Qin, Y. P. Ren, W. L. Pei and L. Zuo, *Talanta*, 2011, **85**, 1260–1264.
- (3) Z. Gao, J. Liu, J. Chang, D. Wu, J. He, K. Wang, F. Xu and K. Jiang, *CrystEngComm*, 2012, **14**, 6639–6646.
- (4) M. Long, L. Tan, H. Liu, Z. He, A. Tang, *Biosensors and Bioelectronics*, 2014, **59**, 243–250.
- (5) S. Felix, P. Kollu, B.P.C. Raghupathy, S.K. Jeong, A.N. Nirmala Grace, *J. Chem. Sci.*, 2014, **126**, 25–32.
- (6) L. Tang, J. Lv, C. Kong, Z. Yanga and J. Li., *New J. Chem.*, 2016, **40**, 6573–6576.
- (7) J. He, Y. Jiang, J. Peng, C. Li, B. Yan, and X. Wang, *J Mater Sci*, 2016, **51**, 9696–9704.
- (8) H. Yin, Z. Cui, L. Wang and Q. Nie, *Sensors and Actuators B* 2016, **222**, 1018–1023.
- (9) M. Saraf, K. Natarajan and S. M. Mobin, *Dalton Trans.*, 2016, **45**, 5833–5840.
- (10) N. Taşaltın, C. Taşaltın, S. Karakuş, A. Kilislioğlu, *Inorganic Chemistry Communications* 2020, **118**, 10799, 1–6.

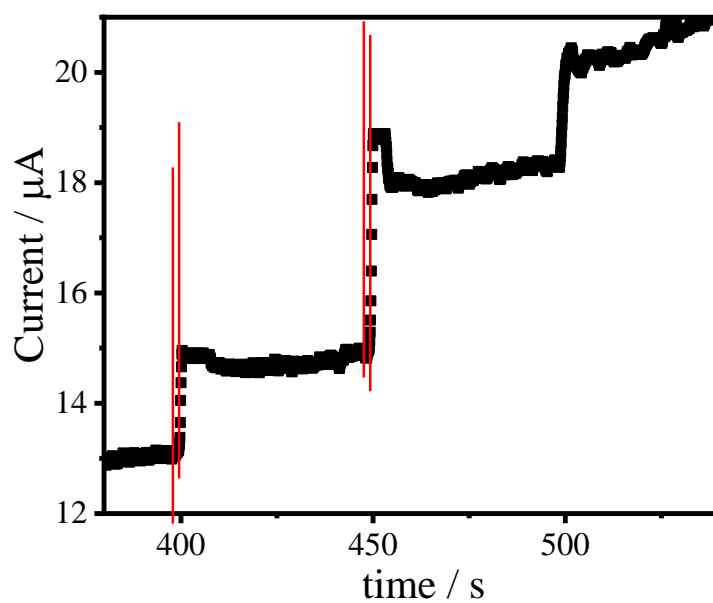

**Fig. S2.** Amperometric response curve of the octahedron Cu<sub>2</sub>O modified electrode derived from Figure 4a presenting the response time for the successive addition of glucose.

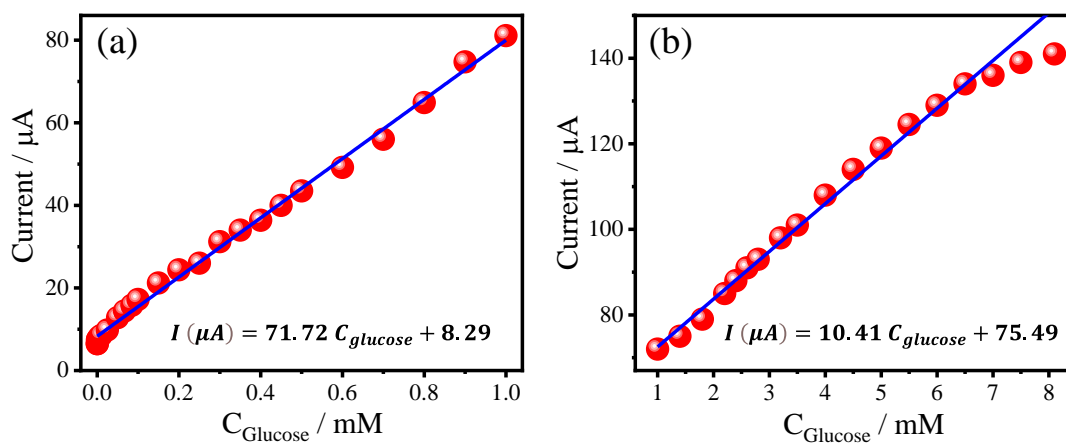

**Fig. S3.** Change in the amperometric current response of Cu<sub>2</sub>O octahedron modified electrode towards successive addition of glucose. (a) depicts the linear range in the lower concentration range (0.1µM–1mM) and (b) demonstrates the higher concentration range (1–7 µM).

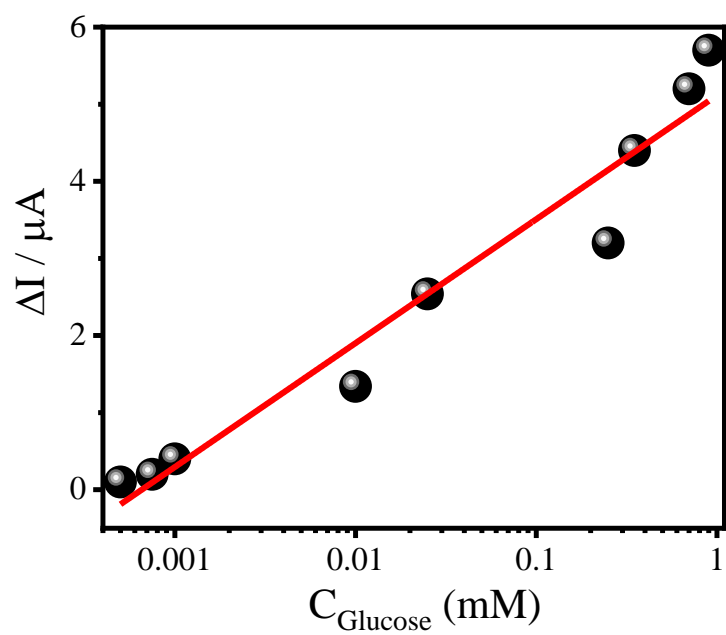

**Fig. S4.** The plot of peak current difference as a function of the concentration of glucose.

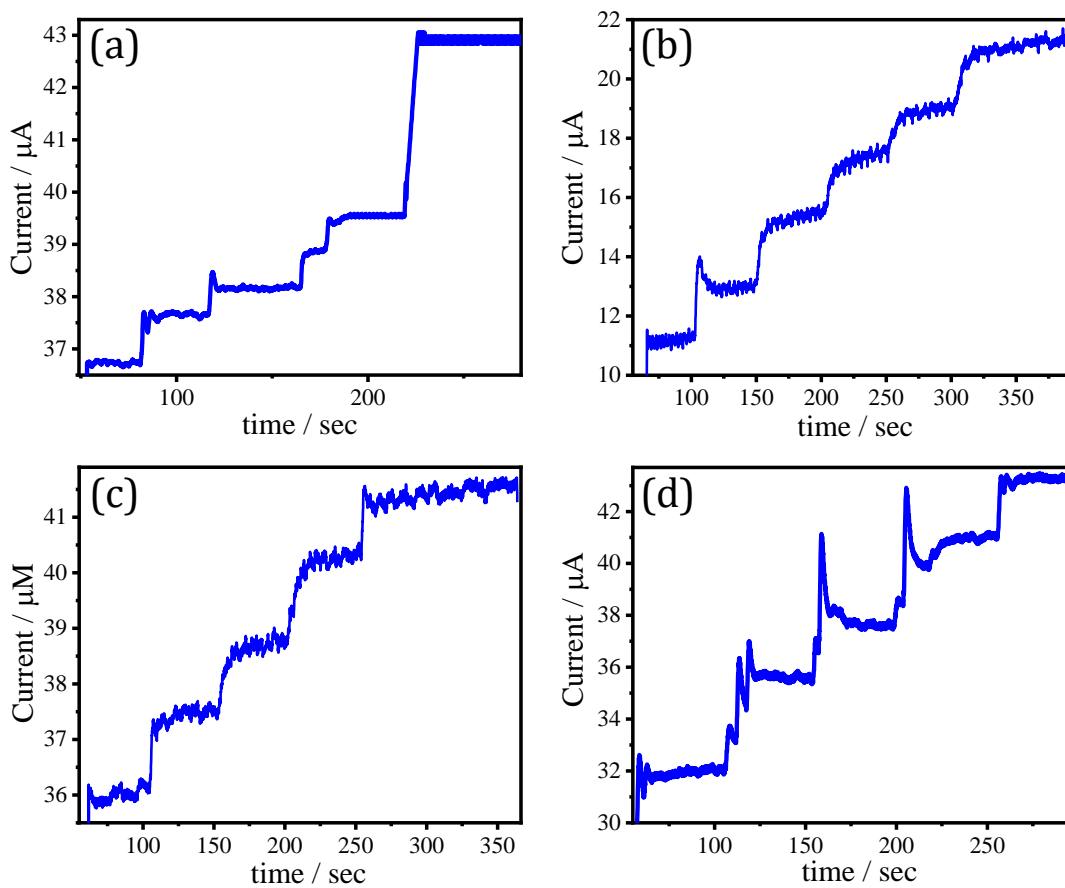

**Fig. S5.** Amperometric response of the  $\text{Cu}_2\text{O}$  octahedron modified electrode in 0.1 M NaOH under constant stirring with successive addition of human serum.

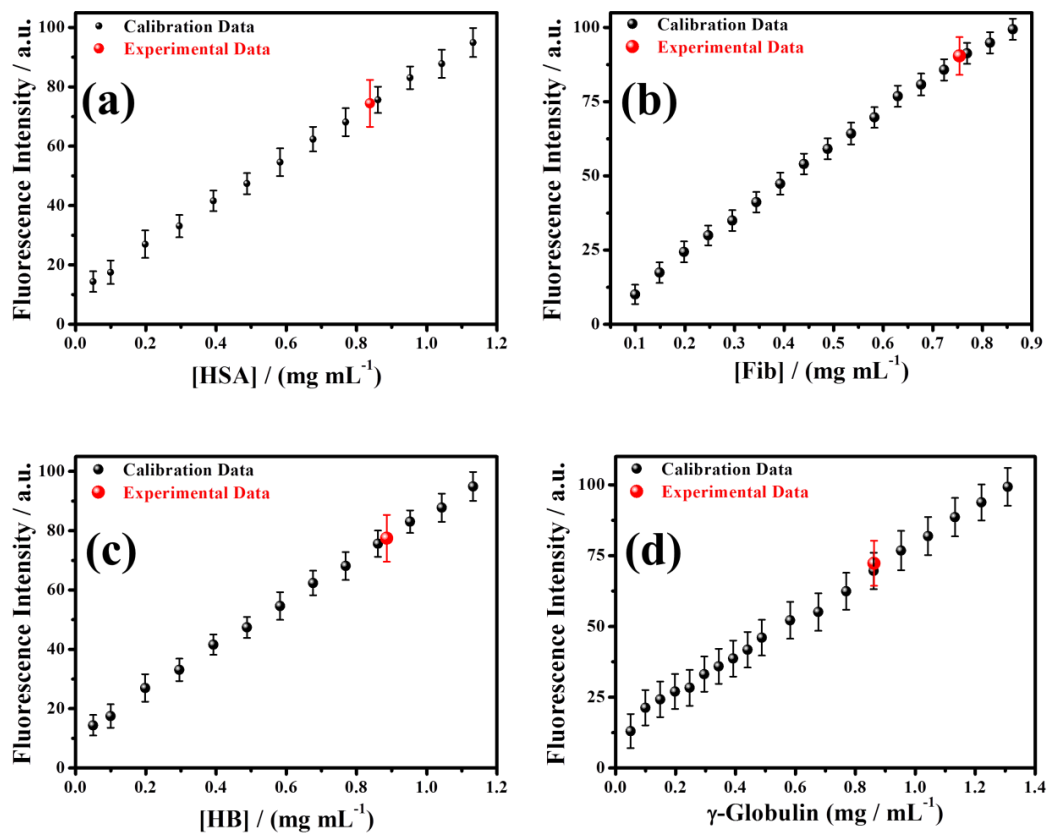

**Fig. S6.** Calibration Curve for different proteins (a) HSA, (b) Fibrinogen, (c) Hemoglobin, (d)  $\gamma$ -Globulin in PBS buffer (pH~ 7.4) with experimentally determined data.

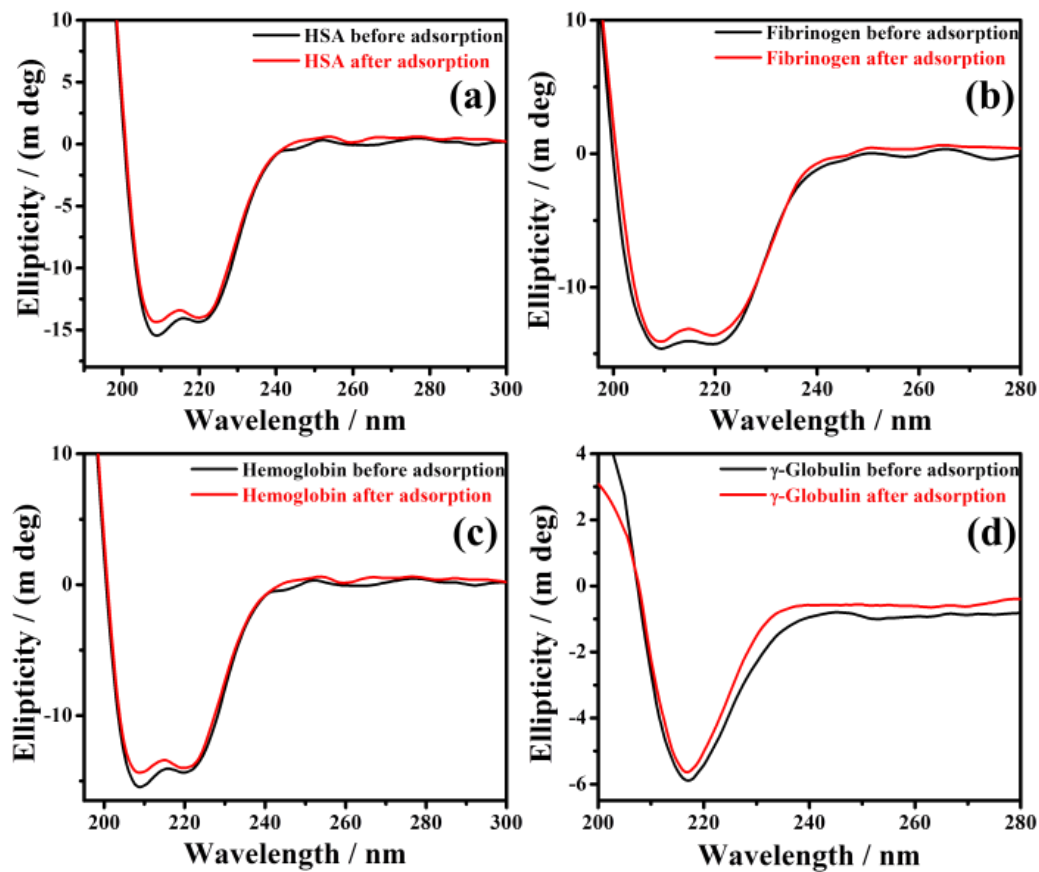

**Fig. S7.** The CD spectral changes of (a) HSA, (b) Fibrinogen, (c) Hemoglobin, (d)  $\gamma$ -Globulin in the absence and presence of Cu<sub>2</sub>O octahedrons.



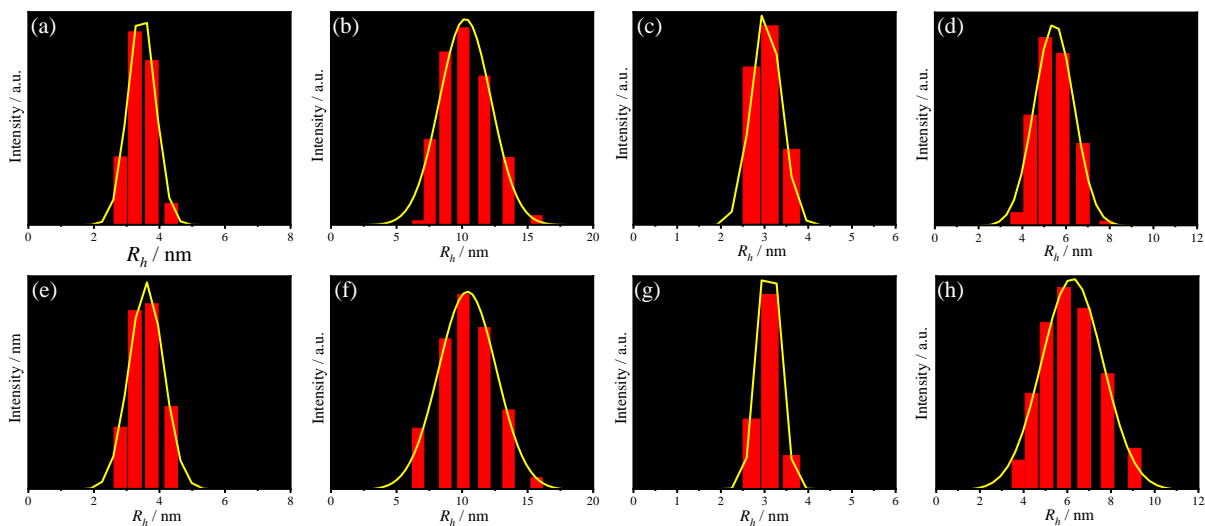

**Fig. S8.** Dynamic Light Scattering (DLS) graphs of native proteins (top row) and unadsorbed proteins in the supernatant (bottom row); (a) & (e) HSA, (b) & (f) Fibrinogen, (c) & (g) Hemoglobin, (d) & (h)  $\gamma$ -Globulin.

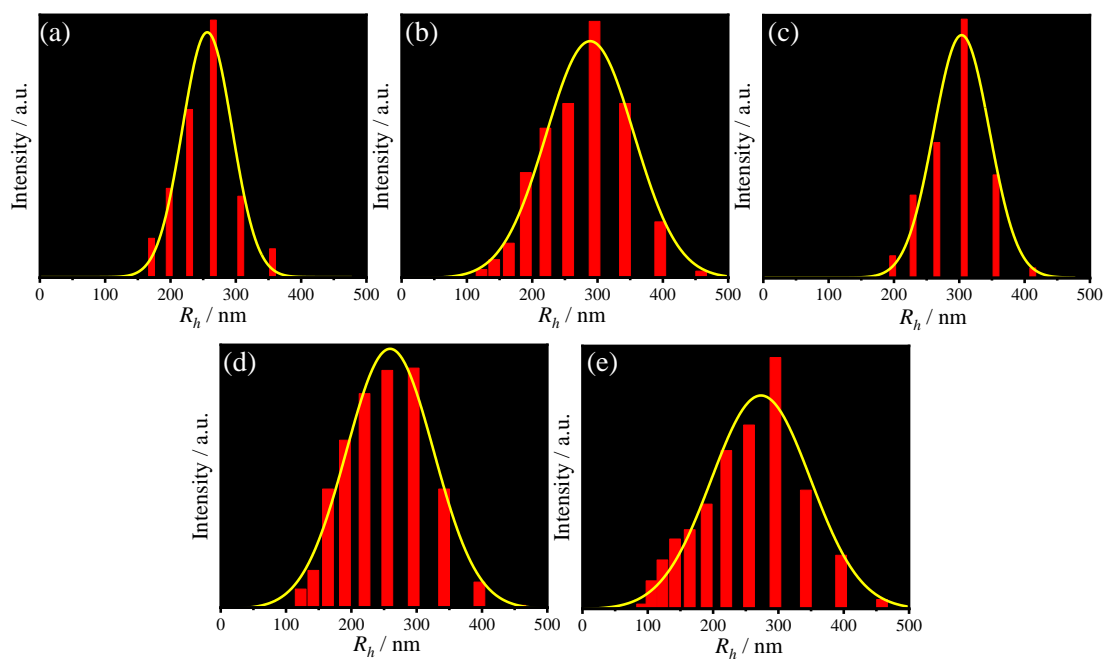

**Fig. S9.** Dynamic Light Scattering (DLS) graphs of (a)  $\text{Cu}_2\text{O}$  and in the presence of proteins (b) HSA, (c) Fibrinogen, (d) Hemoglobin, (e)  $\gamma$ -Globulin.

**Table ST2.** The estimated secondary structure content of proteins in the absence and presence of Cu<sub>2</sub>O octahedrons.

| System                         | CD                               |                     |                 |                                |               |
|--------------------------------|----------------------------------|---------------------|-----------------|--------------------------------|---------------|
|                                | <i><math>\alpha</math>-helix</i> | <i>Antiparallel</i> | <i>Parallel</i> | <i><math>\beta</math>-turn</i> | <i>Random</i> |
| Native HSA                     | 67.60                            | 2.90                | 3.00            | 12.10                          | 13.00         |
| HSA_Cu <sub>2</sub> O          | 67.20                            | 3.00                | 3.00            | 12.20                          | 13.00         |
| Native Fib                     | 35.60                            | 8.10                | 7.80            | 16.60                          | 29.10         |
| Fib_Cu <sub>2</sub> O          | 34.90                            | 8.20                | 8.10            | 16.70                          | 30.10         |
| Native Hb                      | 66.70                            | 2.90                | 3.40            | 11.90                          | 15.60         |
| Hb_Cu <sub>2</sub> O           | 63.70                            | 3.20                | 3.80            | 12.30                          | 17.20         |
| Native $\gamma$ -GB            | 70.1                             | 2.10                | 3.90            | 10.40                          | 22.10         |
| $\gamma$ -GB_Cu <sub>2</sub> O | 67.3                             | 2.30                | 4.10            | 10.80                          | 22.80         |

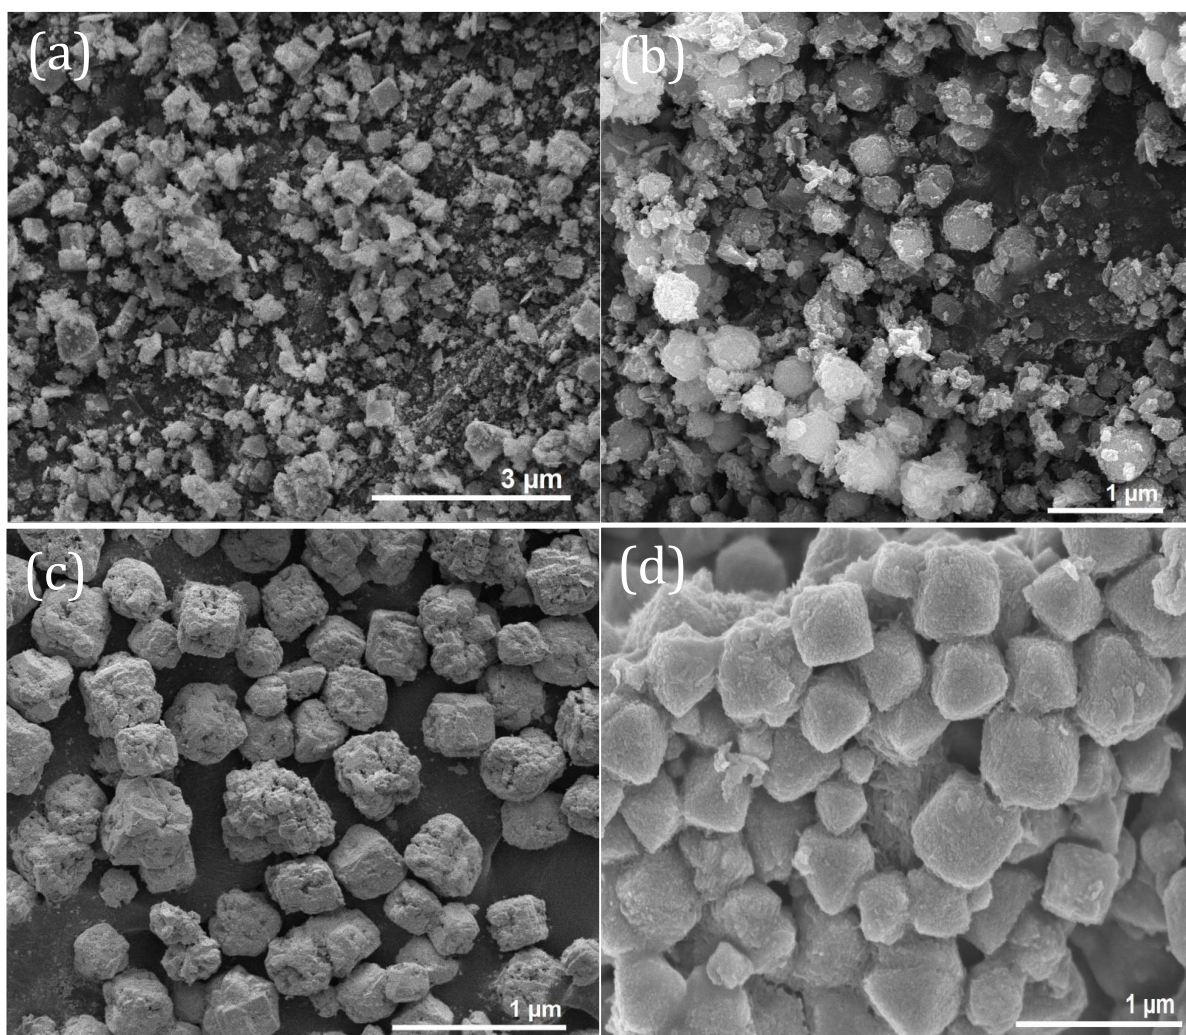

**Fig. S10.** FESEM images of Cu<sub>2</sub>O microstructures upon adsorbing (a) Fibrinogen, (b) HSA, (c)  $\gamma$ -Globulin and (d) Hemoglobin.
